# Supplementary material for: Adventitial lymphatic capillary expansion impacts on plaque T cell accumulation in atherosclerosis
Source: PubMed Central journal article supplement (PMC5368662; doi:10.1038/srep45263), 2017-03-28
Supplement: srep45263-s1.pdf [file srep45263-s1.pdf]

## **Supplemental Information to manuscript:**

### **Adventitial lymphatic capillary expansion impacts on plaque T cell accumulation in atherosclerosis**

Timo Rademakers<sup>\*</sup>, Emiel P.C. van der Vorst<sup>\*</sup>, Isabelle T.M.N. Daissormont<sup>\*</sup>, Jeroen J.T. Otten, Kosta Theodorou, Thomas L. Theelen, Marion Gijbels, Andrey Anisimov, Harri Nurmi, Jan H.N. Lindeman, Andreas Schober, Sylvia Heeneman, Kari Alitalo, Erik A.L. Biessen.

\*Shared first authorship

# Supplemental Figure 1

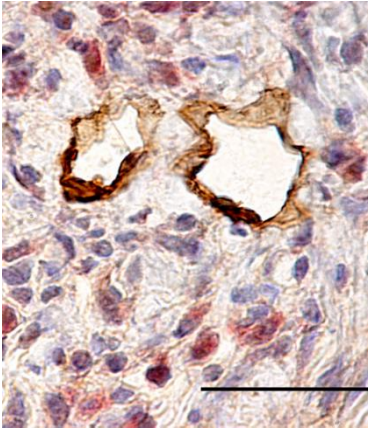

# Supplemental Figure 2

A

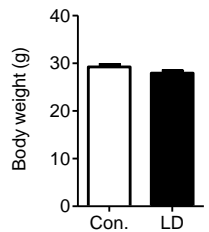

B

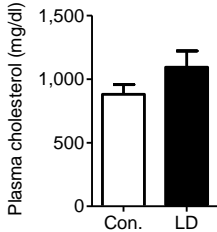

C

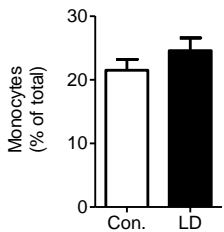

D

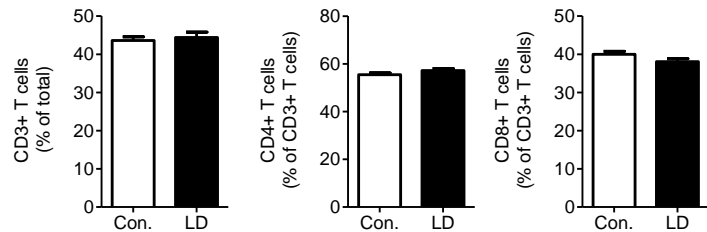

E

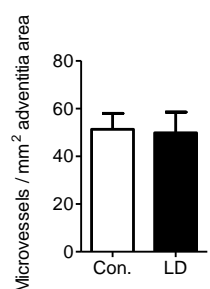

# Supplemental Figure 3

**A**

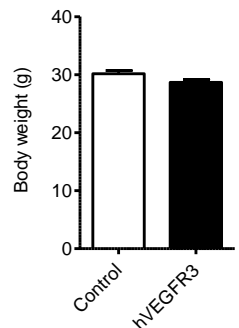

**B**

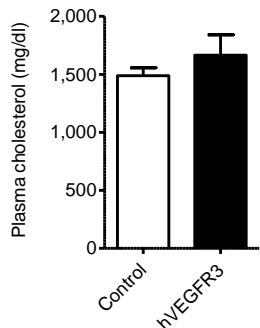

**C**

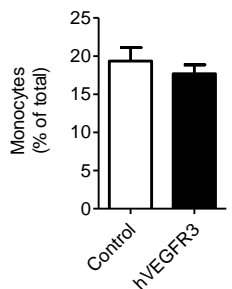

**D**

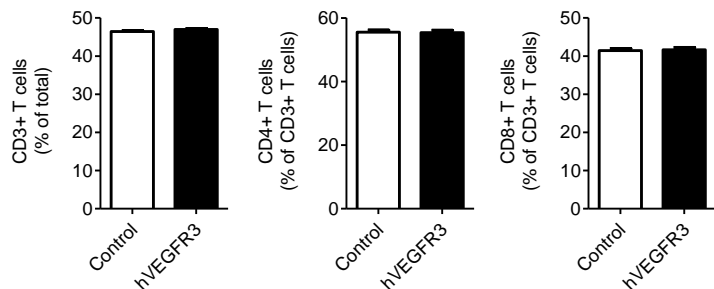

**E**

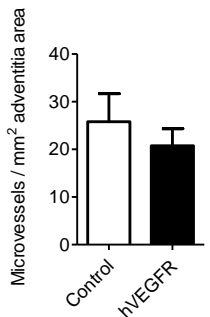

# Supplemental Figure 4

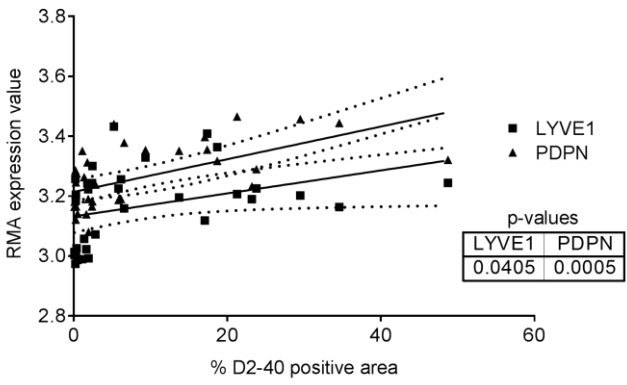

### **Supplemental Figure 1.**

Lyve-1 (Brown)/Mac-3 (Red) double staining showing no overlap between Lyve-1 and Mac3 expression. Scale bar denotes 40 $\mu$ m.

### **Supplemental Figure 2.**

General phenotype of mice after lymph node dissection and WTD, showing body weight (**A**), plasma cholesterol (**B**) and flow cytometry of blood monocytes (**C**) and T cells in peripheral lymph nodes (**D**). (**E**) Quantification of adventitial microvessels.

### **Supplemental Figure 3.**

General phenotype of mice after AAV-hVEGFR3-Ig gene transfer and WTD, showing body weight (**A**), plasma cholesterol (**B**) and flow cytometry of blood monocytes (**C**) and T cells in peripheral lymph nodes (**D**). (**E**) Quantification of adventitial microvessels.

### **Supplemental Figure 4.**

Correlation between podoplanin (PDPN) and Lyve-1 mRNA expression and relative D2-40<sup>+</sup> LEC area (histology) in human endarterectomy plaque tissue.
